# Supplementary material for: A model inter-comparison study to examine limiting factors in modelling Australian tropical savannas
Source: Copernicus journal article supplement (doi:10.5194/bg-13-3245-2016), 2016-06-03
Supplement: Supplementary file 1 [file bg-13-3245-2016-supplement.zip]

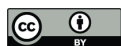

## *Supplement of*

# **A model inter-comparison study to examine limiting factors in modelling Australian tropical savannas**

**Rhys Whitley et al.**

*Correspondence to:* Rhys Whitley (rhys.whitley@mq.edu.au)

- [bg-13-3245-2016-supplement-title-page.pdf](#)
- [FigS1\\_bench\\_tseries.pdf](#)
- [RWhitley\\_S1\\_BenchmarkingModelMetrics.pdf](#)

The copyright of individual parts of the supplement might differ from the CC-BY 3.0 licence.
