# Supplementary material for: A model inter-comparison study to examine limiting factors in modelling Australian tropical savannas
Source: Copernicus journal article supplement (doi:10.5194/bg-13-3245-2016), 2016-06-03
Supplement: Supplementary file 2 [file bg-13-3245-2016-supplement.zip]

| Latent Energy (W m <sup>-2</sup> ) |          |      |      |      |        |            |      |      |        |            |      |      |        | Gross Primary Productivity (μmol m <sup>-2</sup> s <sup>-1</sup> ) |      |      |       |            |      |      |       |            |        |      |       |
|------------------------------------|----------|------|------|------|--------|------------|------|------|--------|------------|------|------|--------|--------------------------------------------------------------------|------|------|-------|------------|------|------|-------|------------|--------|------|-------|
| Full Year                          |          |      |      |      |        | Wet Season |      |      |        | Dry Season |      |      |        | Full Year                                                          |      |      |       | Wet Season |      |      |       | Dry Season |        |      |       |
| Site                               | Model    | r    | sd   | NME  | MBE    | r          | sd   | NME  | MBE    | r          | sd   | NME  | MBE    | r                                                                  | sd   | NME  | MBE   | r          | sd   | NME  | MBE   | r          | sd     | NME  | MBE   |
| Howard Springs                     | BESS     | 0.48 | 0.28 | 1.09 | 4.05   | 0.18       | 0.62 | 1.8  | 3.48   | 0.37       | 0.22 | 1.23 | 4.62   | 0.57                                                               | 0.69 | 1.29 | -0.64 | 0.14       | 1.29 | 2.42 | -0.18 | 0.59       | 0.67   | 1.79 | -1.11 |
|                                    | BIOS2    | 0.53 | 0.05 | 0.85 | -7.33  | 0.23       | 0.17 | 1.43 | -14.1  | 0.53       | 0.03 | 0.93 | -0.47  | 0.63                                                               | 0.07 | 0.88 | -1.13 | 0.19       | 0.11 | 1.61 | -1.48 | 0.46       | 0.04   | 1.29 | -0.77 |
|                                    | CABLE    | 0.5  | 0.66 | 1.55 | -18.1  | -0.11      | 0.82 | 2.26 | -0.02  | 0.41       | 0.02 | 2.1  | -35.9  | 0.69                                                               | 0.28 | 1.28 | -2.21 | 0.24       | 0.28 | 2.21 | -2.74 | 0.45       | 0.13   | 2.09 | -1.68 |
|                                    | LPJGUESS | 0.72 | 0.34 | 1.72 | -46.1  | 0.61       | 0.43 | 2.65 | -52.51 | 0.42       | 0.3  | 2.13 | -39.61 | 0.47                                                               | 0.51 | 1.39 | -2.4  | 0.43       | 0.48 | 2.82 | -3.69 | 0.28       | 0.01   | 1.63 | -1.1  |
|                                    | MAESPA   | 0.57 | 0.21 | 1.44 | -37.36 | 0.61       | 0.23 | 2.64 | -50.29 | 0.39       | 0.41 | 1.44 | -24.62 | 0.75                                                               | 0.17 | 0.71 | -0.38 | 0.53       | 0.59 | 1.37 | -0.42 | 0.52       | 0.17   | 1.01 | -0.34 |
|                                    | SPA1     | 0.7  | 0.13 | 0.71 | 4.48   | 0.62       | 0.17 | 1.01 | -4.15  | 0.63       | 0.2  | 0.97 | 13.23  | 0.86                                                               | 0.2  | 0.46 | -0.17 | 0.64       | 0.3  | 0.8  | -0.42 | 0.65       | 0.2    | 0.74 | 0.08  |
|                                    | emp1     | 0.29 | 0.72 | 1.37 | -31.84 | 0.69       | 0.58 | 2.69 | -53.29 | 0.1        | 0.73 | 1.08 | -10.13 | 0.08                                                               | 0.81 | 1.61 | -2.85 | 0.4        | 0.69 | 3.46 | -4.54 | -0.05      | 0.73   | 1.58 | -1.14 |
|                                    | emp2     | 0.59 | 0.48 | 0.95 | -16.85 | 0.56       | 0.56 | 1.48 | -27.03 | 0.14       | 0.37 | 1.16 | -6.53  | 0.66                                                               | 0.55 | 1.13 | -1.83 | 0.46       | 0.64 | 2.18 | -2.81 | 0.17       | 0.24   | 1.47 | -0.84 |
|                                    | emp3     | 0.77 | 0.1  | 0.6  | -0.57  | 0.65       | 0.06 | 0.84 | -2.23  | 0.55       | 0.2  | 0.85 | 1.11   | 0.79                                                               | 0.1  | 0.57 | -0.05 | 0.53       | 0.13 | 0.92 | -0.27 | 0.52       | 0.09   | 1.02 | 0.17  |
| Adelaide River                     | BESS     | 0.62 | 0.02 | 0.86 | 17.43  | 0.24       | 0.26 | 1.40 | 10.41  | 0.43       | 0.20 | 1.98 | 26.08  | 0.69                                                               | 0.01 | 0.68 | -0.83 | 0.35       | 0.13 | 1.24 | -1.06 | 0.46       | 0.06   | 1.33 | -0.55 |
|                                    | BIOS2    | 0.89 | 0.04 | 0.55 | -17.05 | 0.71       | 0.27 | 1.08 | -18.68 | 0.82       | 0.08 | 1.08 | -15.43 | 0.66                                                               | 0.30 | 0.83 | -1.84 | 0.35       | 0.20 | 1.45 | -2.68 | 0.23       | 0.12   | 1.77 | -1.00 |
|                                    | CABLE    | 0.78 | 0.27 | 0.76 | -11.48 | 0.27       | 0.40 | 1.52 | -2.05  | 0.79       | 0.05 | 1.41 | -20.79 | 0.80                                                               | 0.55 | 0.98 | -2.16 | 0.67       | 0.58 | 1.74 | -3.33 | -0.22      | 0.35   | 1.95 | -1.00 |
|                                    | LPJGUESS | 0.81 | 0.40 | 1.17 | -43.63 | 0.67       | 0.51 | 2.28 | -57.76 | 0.60       | 0.09 | 1.88 | -26.19 | 0.52                                                               | 0.62 | 1.04 | -2.34 | 0.27       | 0.62 | 2.00 | -3.78 | 0.22       | 0.17   | 1.64 | -0.56 |
|                                    | MAESPA   | 0.51 | 0.54 | 1.08 | -39.65 | 0.41       | 0.17 | 2.87 | -66.98 | 0.47       | 0.56 | 0.95 | -12.69 | 0.79                                                               | 0.30 | 0.63 | -1.17 | 0.60       | 0.21 | 1.16 | -1.93 | 0.22       | 0.49   | 1.11 | -0.43 |
|                                    | SPA1     | 0.82 | 0.13 | 0.57 | -16.42 | 0.58       | 0.10 | 1.30 | -25.53 | 0.78       | 0.02 | 0.82 | -7.43  | 0.87                                                               | 0.38 | 0.54 | -0.76 | 0.78       | 0.42 | 0.90 | -1.51 | 0.04       | 0.28   | 1.25 | -0.02 |
|                                    | emp1     | 0.28 | 0.75 | 1.01 | -17.42 | 0.61       | 0.60 | 1.95 | -48.53 | 0.37       | 0.61 | 1.68 | 20.92  | 0.09                                                               | 0.80 | 0.99 | -1.44 | 0.20       | 0.72 | 1.84 | -3.43 | 0.43       | 0.51   | 1.80 | 1.02  |
|                                    | emp2     | 0.80 | 0.54 | 0.67 | -10.32 | 0.72       | 0.59 | 1.26 | -29.10 | 0.59       | 0.11 | 1.18 | 12.82  | 0.79                                                               | 0.51 | 0.65 | -0.89 | 0.64       | 0.65 | 1.19 | -1.94 | 0.66       | 0.39   | 1.26 | 0.40  |
|                                    | emp3     | 0.84 | 0.11 | 0.49 | -0.17  | 0.64       | 0.01 | 0.89 | -4.66  | 0.57       | 0.16 | 0.94 | 5.36   | 0.89                                                               | 0.06 | 0.44 | -0.29 | 0.77       | 0.20 | 0.66 | -0.33 | 0.58       | 0.49   | 1.42 | -0.24 |
| Daly Uncleared                     | BESS     | 0.60 | 0.41 | 1.06 | 7.12   | 0.31       | 0.65 | 1.71 | 10.82  | 0.18       | 0.59 | 1.72 | 3.35   | 0.72                                                               | 0.50 | 1.01 | -0.54 | 0.55       | 0.67 | 1.31 | -0.04 | 0.33       | 0.05   | 2.50 | -1.06 |
|                                    | BIOS2    | 0.73 | 0.19 | 0.80 | -7.22  | 0.43       | 0.21 | 1.17 | -2.25  | 0.29       | 0.10 | 1.54 | -12.28 | 0.69                                                               | 0.12 | 0.77 | 0.53  | 0.49       | 0.26 | 0.91 | 0.42  | 0.06       | 0.48   | 2.21 | 0.64  |
|                                    | CABLE    | 0.45 | 1.30 | 1.93 | -8.66  | -0.02      | 1.89 | 3.14 | 12.47  | 0.09       | 0.50 | 3.02 | -29.46 | 0.73                                                               | 0.31 | 0.93 | -1.37 | 0.60       | 0.42 | 1.10 | -1.75 | 0.02       | 0.07   | 2.57 | -0.99 |
|                                    | LPJGUESS | 0.81 | 0.19 | 1.34 | -33.88 | 0.70       | 0.25 | 1.85 | -37.29 | 0.25       | 0.14 | 2.82 | -30.41 | 0.49                                                               | 0.54 | 0.85 | -1.05 | 0.29       | 0.54 | 1.28 | -2.02 | 0.06       | 0.03   | 1.44 | -0.06 |
|                                    | MAESPA   | 0.56 | 0.11 | 0.96 | -16.25 | 0.54       | 0.26 | 1.63 | -27.94 | 0.20       | 0.05 | 1.38 | -4.73  | 0.82                                                               | 0.10 | 0.57 | 0.39  | 0.71       | 0.03 | 0.72 | 0.16  | 0.39       | 0.30   | 1.40 | 0.61  |
|                                    | SPA1     | 0.65 | 0.05 | 0.77 | -7.67  | 0.43       | 0.21 | 1.30 | -13.05 | 0.35       | 0.11 | 1.12 | -2.38  | 0.83                                                               | 0.37 | 0.68 | 0.61  | 0.70       | 0.46 | 0.74 | 0.20  | 0.37       | 0.37   | 2.15 | 1.02  |
|                                    | emp1     | 0.35 | 0.60 | 0.95 | 0.00   | 0.56       | 0.44 | 1.25 | -20.93 | 0.13       | 0.38 | 2.10 | 21.30  | 0.11                                                               | 0.72 | 1.01 | -0.01 | 0.12       | 0.66 | 1.15 | -1.46 | 0.00       | 0.35   | 3.07 | 1.46  |
|                                    | emp2     | 0.73 | 0.22 | 0.65 | 0.57   | 0.63       | 0.40 | 0.79 | -5.16  | 0.25       | 0.31 | 1.57 | 6.39   | 0.68                                                               | 0.31 | 0.70 | 0.06  | 0.54       | 0.58 | 0.79 | -0.31 | 0.15       | 0.64   | 2.16 | 0.43  |
|                                    | emp3     | 0.79 | 0.12 | 0.58 | 0.51   | 0.72       | 0.25 | 0.68 | -2.07  | 0.26       | 0.20 | 1.43 | 3.14   | 0.84                                                               | 0.17 | 0.52 | -0.06 | 0.78       | 0.37 | 0.62 | -0.11 | 0.28       | 0.16   | 1.49 | -0.02 |
| Dry River                          | BESS     | 0.55 | 0.19 | 0.83 | 8.09   | 0.33       | 0.21 | 1.14 | 2.00   | 0.45       | 0.14 | 1.36 | 14.59  | 0.59                                                               | 0.79 | 1.40 | 0.73  | 0.51       | 1.01 | 1.87 | 1.37  | 0.48       | 0.11   | 1.05 | 0.04  |
|                                    | BIOS2    | 0.66 | 0.13 | 0.68 | -7.78  | 0.44       | 0.21 | 1.00 | -7.09  | 0.51       | 0.28 | 0.95 | -8.52  | 0.50                                                               | 0.12 | 1.08 | 0.85  | 0.49       | 0.26 | 1.15 | 0.71  | 0.34       | 0.05   | 1.23 | 0.99  |
|                                    | CABLE    | 0.63 | 0.53 | 1.36 | -14.39 | 0.42       | 0.53 | 1.75 | 1.82   | 0.35       | 0.15 | 2.48 | -30.34 | 0.59                                                               | 0.04 | 1.10 | -0.85 | 0.47       | 0.10 | 1.01 | -0.54 | 0.45       | 0.40   | 1.44 | -1.16 |
|                                    | LPJGUESS | 0.64 | 0.38 | 1.10 | -32.67 | 0.37       | 0.55 | 1.35 | -37.78 | 0.44       | 0.16 | 2.15 | -27.21 | 0.46                                                               | 0.29 | 0.93 | -0.13 | 0.25       | 0.34 | 1.08 | -0.15 | 0.39       | 0.40   | 0.93 | -0.11 |
|                                    | MAESPA   | 0.28 | 0.61 | 1.05 | -27.16 | 0.12       | 0.57 | 1.56 | -46.75 | -0.22      | 0.42 | 1.42 | -7.84  | 0.61                                                               | 0.18 | 0.78 | 0.35  | 0.57       | 0.10 | 0.84 | 0.43  | 0.41       | 0.69   | 0.87 | 0.27  |
|                                    | SPA1     | 0.60 | 0.23 | 0.89 | -19.99 | 0.43       | 0.23 | 1.24 | -25.98 | 0.14       | 0.19 | 1.42 | -14.09 | 0.65                                                               | 0.26 | 0.75 | 0.18  | 0.57       | 0.32 | 0.81 | 0.32  | 0.59       | 0.63   | 0.83 | 0.03  |
|                                    | emp1     | 0.10 | 0.76 | 1.01 | 4.03   | 0.06       | 0.75 | 1.13 | -18.91 | -0.29      | 0.47 | 2.27 | 28.53  | -0.03                                                              | 0.62 | 1.28 | 1.07  | -0.01      | 0.59 | 1.10 | 0.56  | -0.29      | 0.59   | 1.80 | 1.60  |
|                                    | emp2     | 0.50 | 0.44 | 0.82 | 2.21   | 0.26       | 0.68 | 0.95 | -4.63  | -0.21      | 0.02 | 1.72 | 9.51   | 0.51                                                               | 0.11 | 1.24 | 0.90  | 0.50       | 0.28 | 1.38 | 1.56  | 0.10       | 0.16   | 1.31 | 0.20  |
|                                    | emp3     | 0.62 | 0.55 | 0.72 | -8.00  | 0.47       | 0.73 | 0.92 | -17.31 | -0.09      | 0.38 | 1.31 | 1.95   | 0.64                                                               | 0.37 | 0.79 | 0.29  | 0.64       | 0.52 | 0.79 | 0.40  | 0.38       | 0.68   | 0.94 | 0.17  |
| Sturt Plains                       | BESS     | 0.60 | 0.23 | 0.90 | 13.80  | 0.49       | 0.10 | 0.96 | 1.36   | 0.40       | 0.10 | 2.69 | 27.06  | 0.65                                                               | 0.11 | 0.79 | 0.38  | 0.59       | 0.29 | 0.93 | 0.16  | 0.59       | 0.09</ |      |       |
