# Supplementary figures and images for: A model inter-comparison study to examine limiting factors in modelling Australian tropical savannas
Source: Copernicus journal article supplement (doi:10.5194/bg-13-3245-2016), 2016-06-03

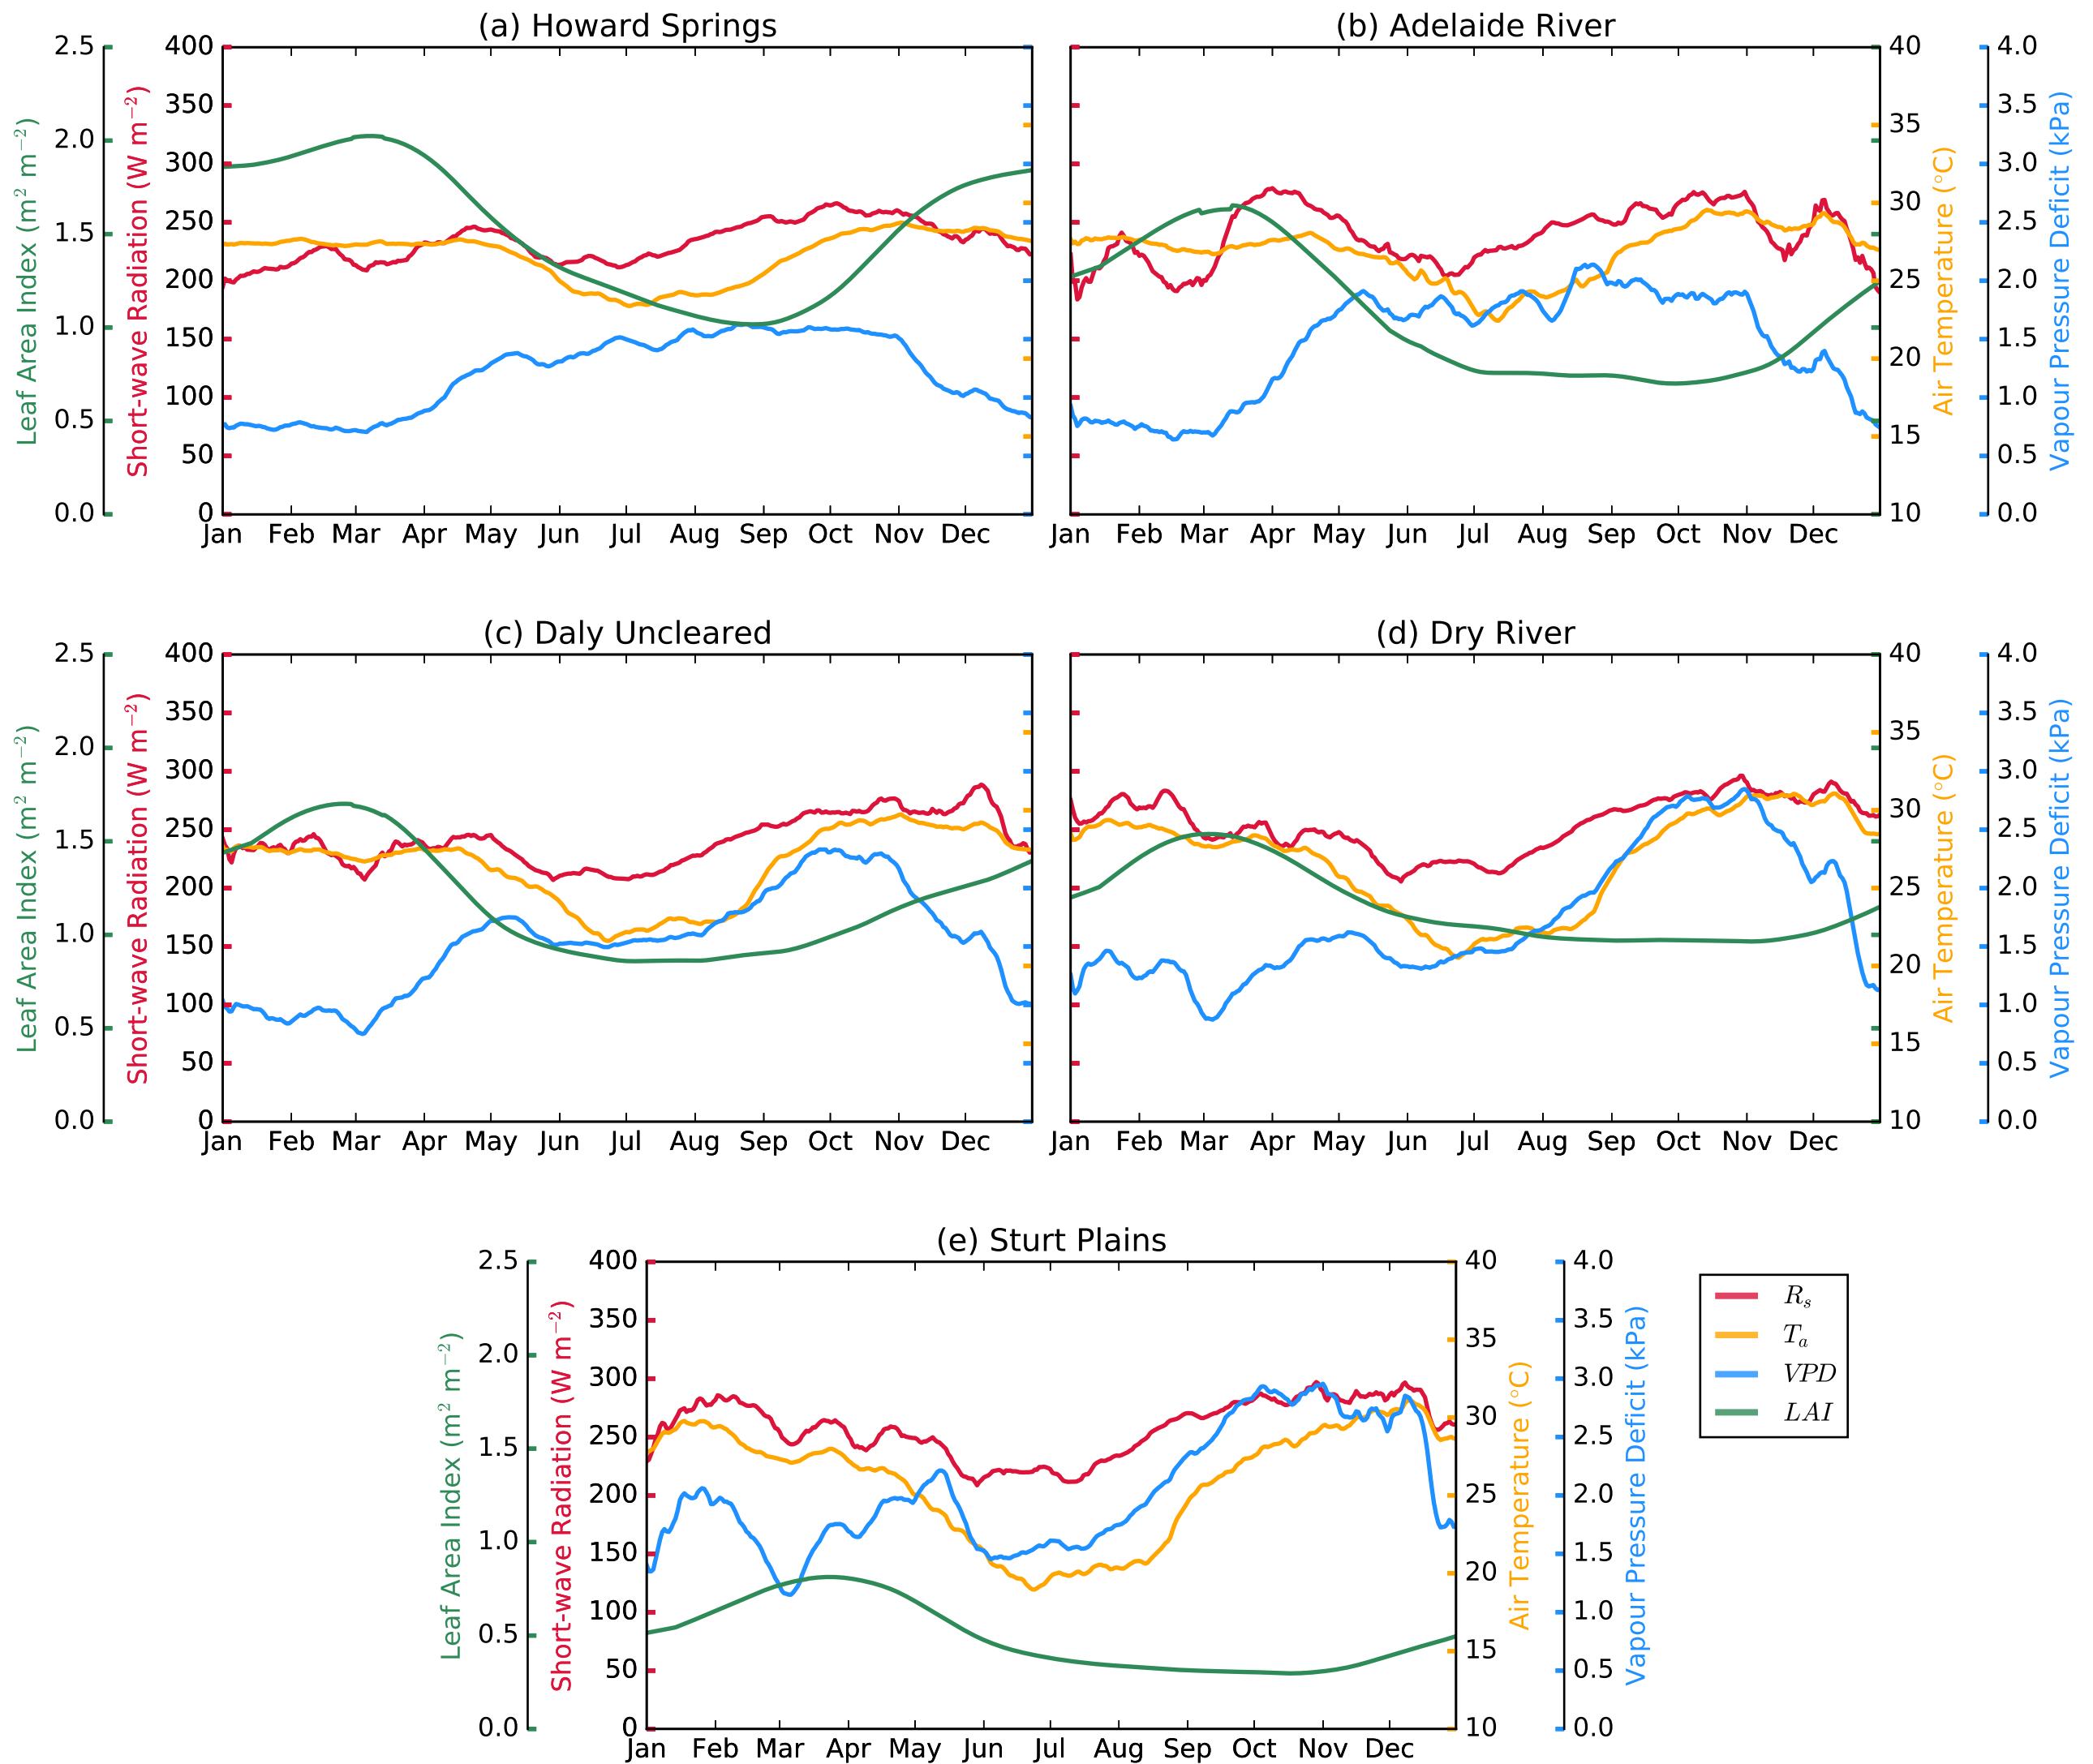

Supplement: Supplementary file 3 [file bg-13-3245-2016-supplement.zip]
